# Supplementary material
Source: PubMed Central journal article supplement (PMC6058704)
Supplement: NIHMS952896-supplement-1.pdf [file NIHMS952896-supplement-1.pdf]

| <b>Recipient</b> | <b>Transgene</b> | <b>Fold expansion</b> | <b>Days of ex vivo culture</b> |
|------------------|------------------|-----------------------|--------------------------------|
| R.301            | GFP              | 11                    | 9                              |
|                  | CD20 CAR         | 8                     | 8                              |
| R.302            | GFP              | 14-16                 | 15-17                          |
|                  | CD20 CAR         | 5-26                  | 9-17                           |
| R.303            | CD20 CAR         | 12                    | 11                             |
| R.304            | CD20 CAR         | 9-36                  | 9-15                           |

## Supplementary Table S1
