# Supplementary material
Source: PubMed Central journal article supplement (PMC6058704)
Supplement: NIHMS952896-supplement-2.pdf [file NIHMS952896-supplement-2.pdf]

| <b>Activity level</b> | <b>Movement speed</b> | <b>Tremor</b> | <b>Gait</b> | <b>Seizure</b> |
|-----------------------|-----------------------|---------------|-------------|----------------|
| Normal = 0            | Normal = 0            | None = 0      | Normal = 0  | Absent = 0     |
| Reduced = 1           | Slow = 1              | Minimal = 1   | Ataxic = 1  | Present = 1    |
| Lethargic = 2         |                       | Mild = 2      |             |                |
|                       |                       | Moderate = 3  |             |                |
|                       |                       | Severe = 4    |             |                |

## Supplementary Table S2
