# Supplementary material
Source: PubMed Central journal article supplement (PMC6058704)
Supplement: NIHMS952896-supplement-8.pdf [file NIHMS952896-supplement-8.pdf]

| Antibody/Product                     | Company         | Catalog number | Host/Isotype         | Clone  | Fluorescent marker |
|--------------------------------------|-----------------|----------------|----------------------|--------|--------------------|
| CD3                                  | BD Biosciences  | 557757         | Mouse/IgG1           | SP34-2 | APC-Cy7            |
| CD3                                  | BD Biosciences  | 557917         | Mouse/IgG1           | SP34-2 | AF700              |
| CD3                                  | BD Biosciences  | 556611         | Mouse/IgG3           | SP34   | FITC               |
| CD4                                  | BD Biosciences  | 563914         | Mouse/IgG1           | L200   | BV786              |
| CD8                                  | BD Biosciences  | 563795         | Mouse/IgG1           | RPA-T8 | BUV395             |
| CD19                                 | Beckman Coulter | IM1285U        | Mouse/IgG1           | J3-119 | PE                 |
| CD20                                 | eBioscience     | 45-0209-42     | Mouse/IgG2b          | 2H7    | PerCP-Cy5.5        |
| CD25                                 | Miltenyi        | 130-091-024    | Mouse/IgG2b          | 4E3    | PE                 |
| CD28                                 | eBioscience     | 25-0289-42     | Mouse/IgG1           | CD28.2 | PE-Cy7             |
| CD28                                 | eBioscience     | 45-0289-42     | Mouse/IgG1           | CD28.2 | PerCP-Cy5.5        |
| CD29 (integrin $\beta$ 1)            | eBioscience     | 11-0299-42     | Mouse/IgG1           | TS2/16 | FITC               |
| CD49d (integrin $\alpha$ 4)          | BD Biosciences  | 565277         | Mouse/IgG1           | 9F10   | BV421              |
| CD95                                 | Biolegend       | 305628         | Mouse/IgG1           | DX2    | BV605              |
| CD95                                 | BD Biosciences  | 561636         | Mouse/IgG1           | DX2    | PE-Cy7             |
| Cetuximab (Erbix)                    | BD Biosciences  | 623182         | Chimeric mouse/human | N/A    | APC                |
| Ki-67                                | BD Biosciences  | 561284         | Mouse/IgG1           | B56    | PerCP-Cy5.5        |
| Debris Removal Solution              | Miltenyi Biotec | 130-109-398    | N/A                  | N/A    | N/A                |
| Pan T Cell Isolation Kit, NHP        | Miltenyi Biotec | 130-091-993    | N/A                  | N/A    | N/A                |
| T Cell Activation/Expansion Kit, NHP | Miltenyi Biotec | 130-092-919    | N/A                  | N/A    | N/A                |
| Tumor Dissociation Kit, Human        | Miltenyi Biotec | 130-095-929    | N/A                  | N/A    | N/A                |

## Supplementary Table S3
