# Supplementary material
Source: PubMed Central journal article supplement (PMC6058704)

**A**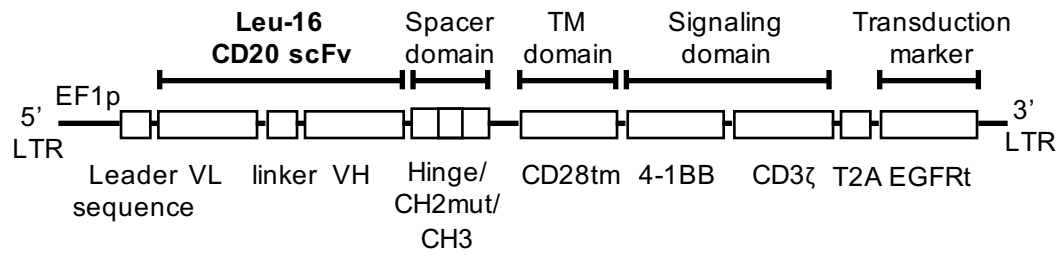**B**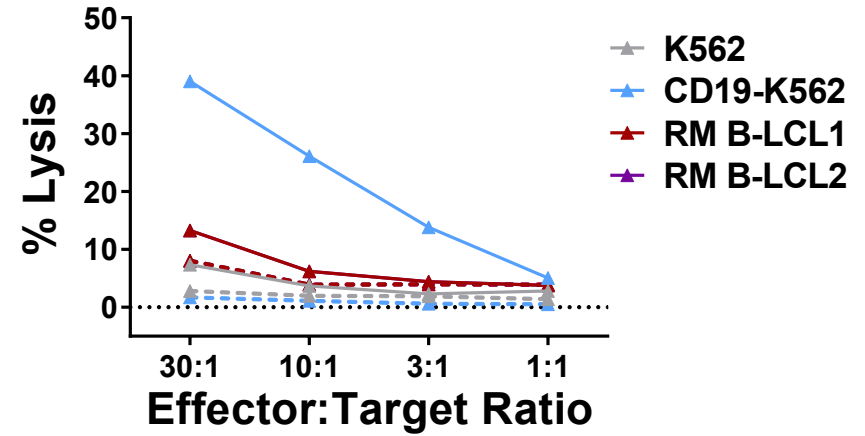**Supplementary Figure S1**

Supplement: NIHMS952896-supplement-3.pdf [file NIHMS952896-supplement-3.pdf]

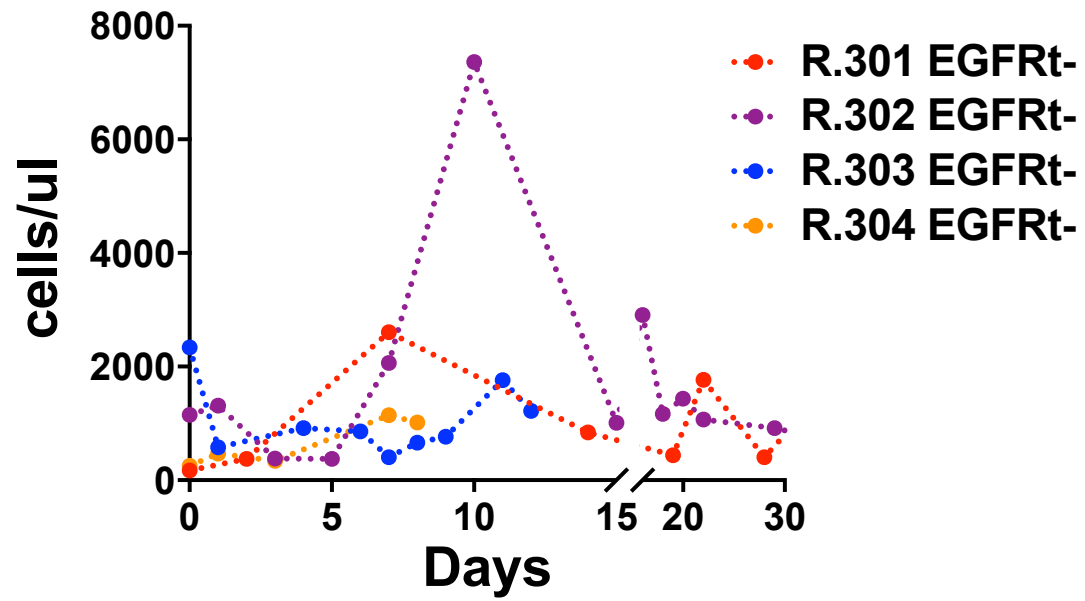

**Supplementary Figure S2**

Supplement: NIHMS952896-supplement-4.pdf [file NIHMS952896-supplement-4.pdf]

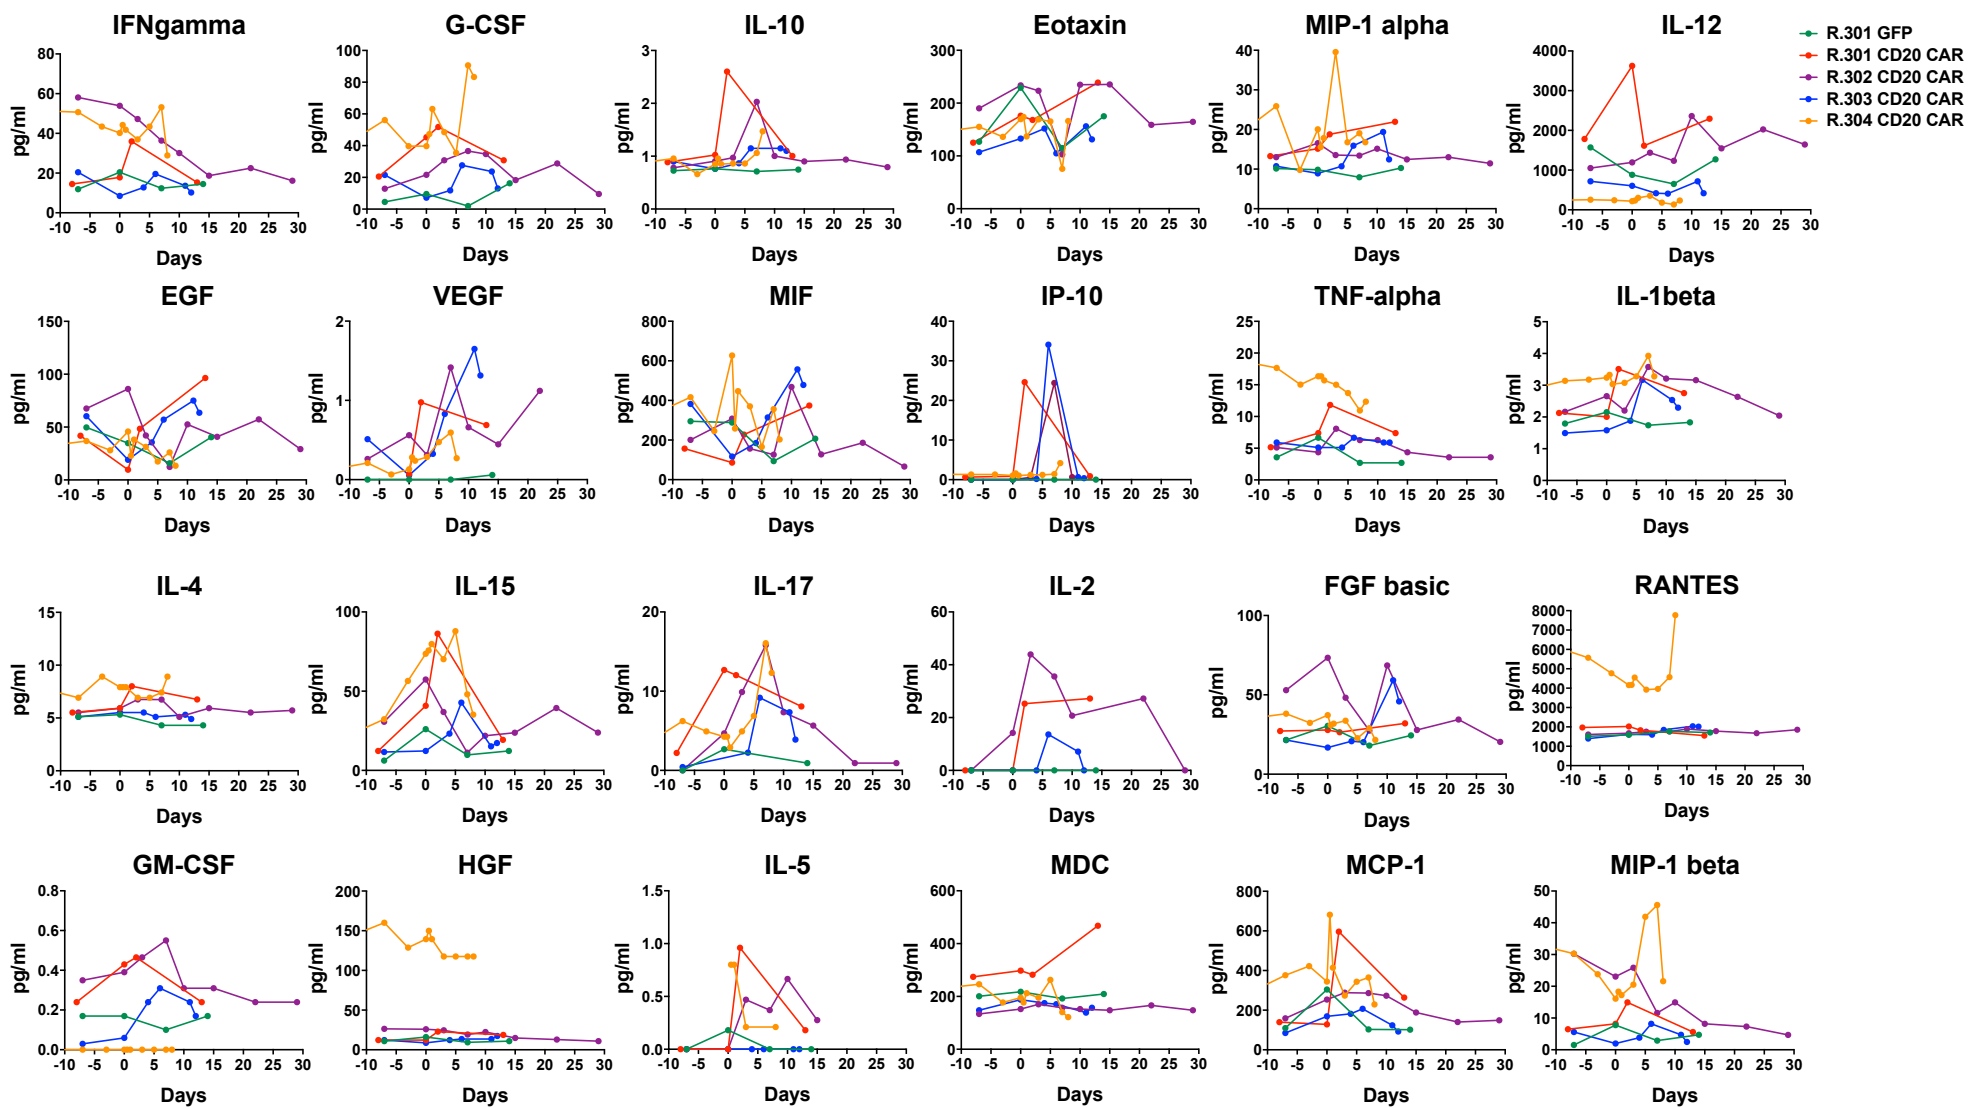

**Supplementary Figure S3**

Supplement: NIHMS952896-supplement-5.pdf [file NIHMS952896-supplement-5.pdf]

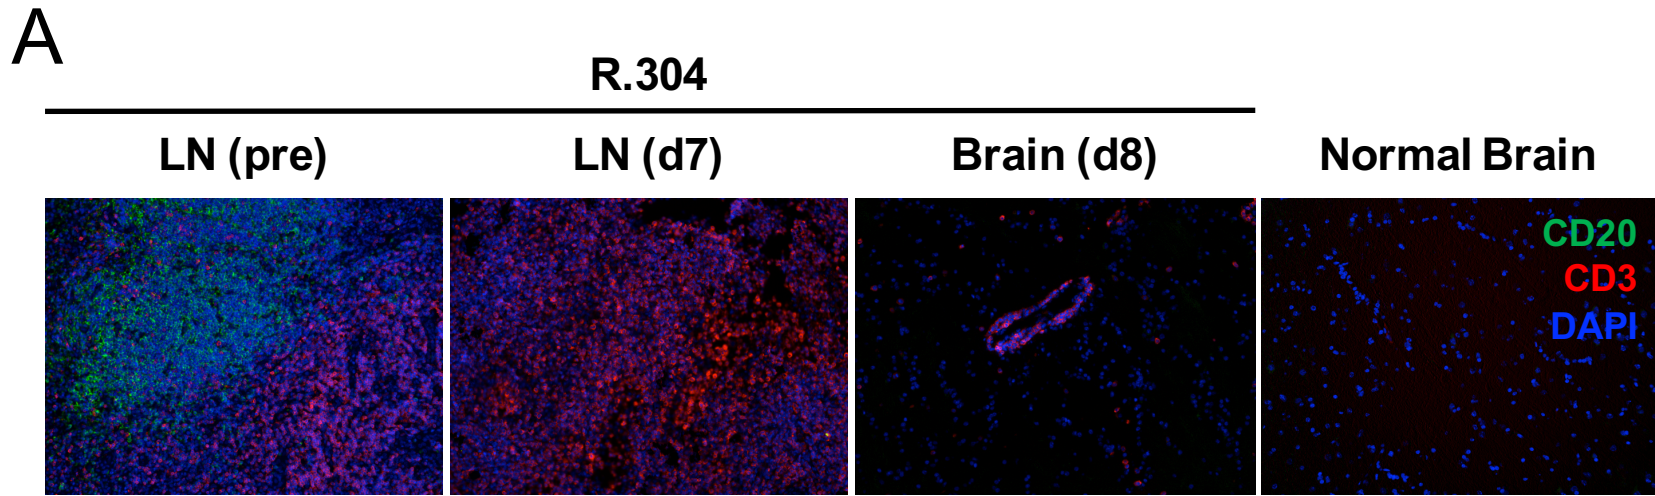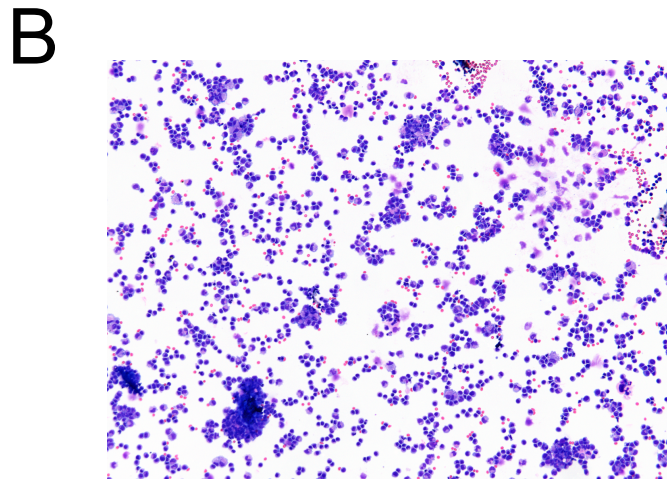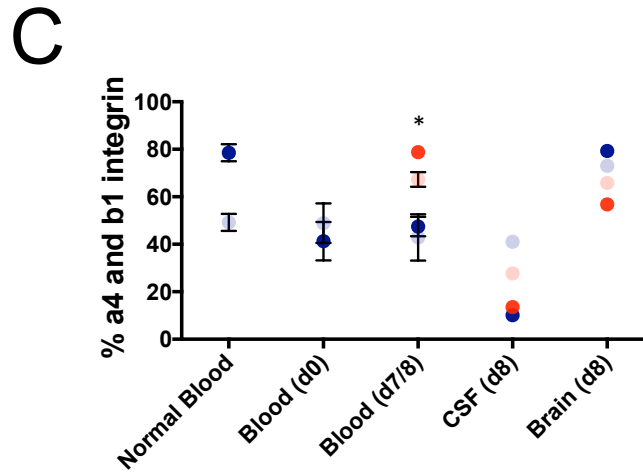

**Supplementary Figure S4**

Supplement: NIHMS952896-supplement-6.pdf [file NIHMS952896-supplement-6.pdf]

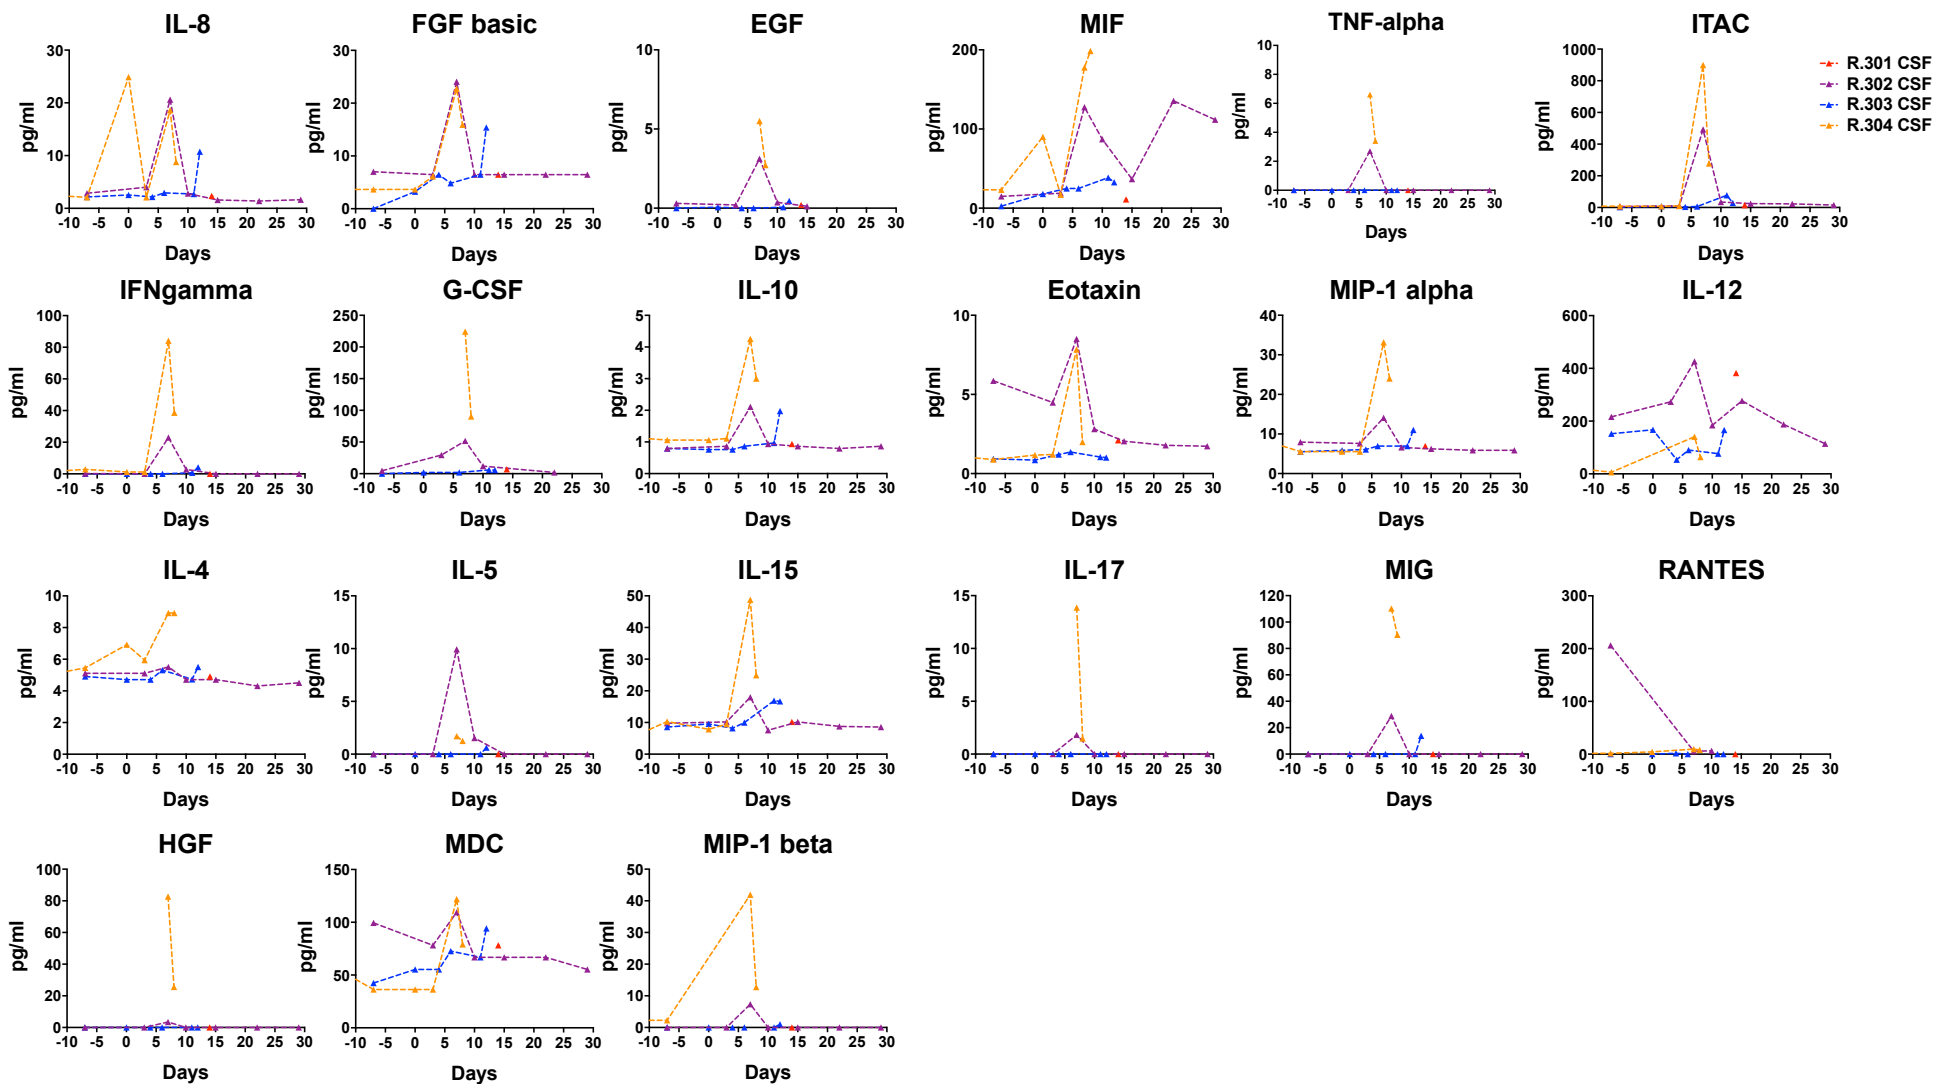

**Supplementary Figure S5**

Supplement: NIHMS952896-supplement-7.pdf [file NIHMS952896-supplement-7.pdf]
